# Supplementary material for: An Incompatibility between a Mitochondrial tRNA and Its Nuclear-Encoded tRNA Synthetase Compromises Development and Fitness in Drosophila
Source: PubMed Central journal article supplement (PMC3561102; doi:10.1371/journal.pgen.1003238), 2013-01-31

**Figure S1**

**A**

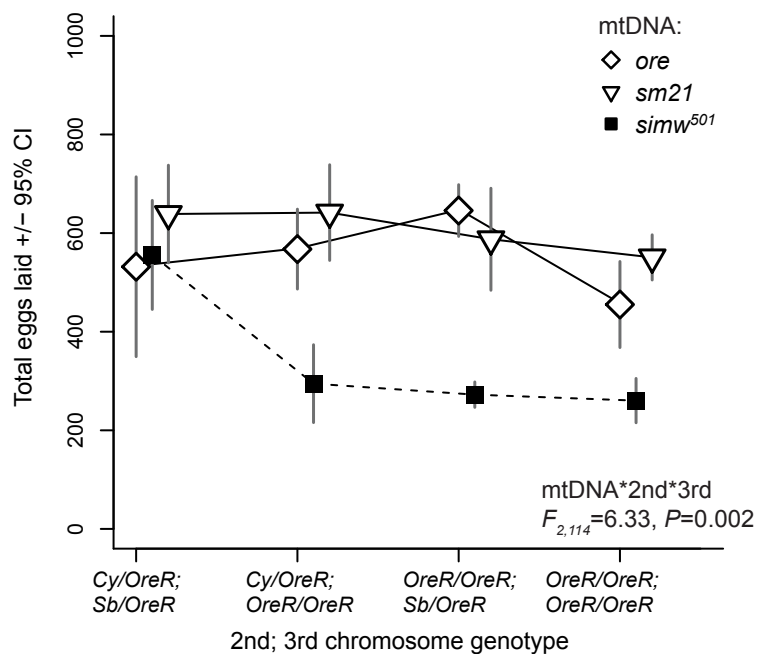

**B**

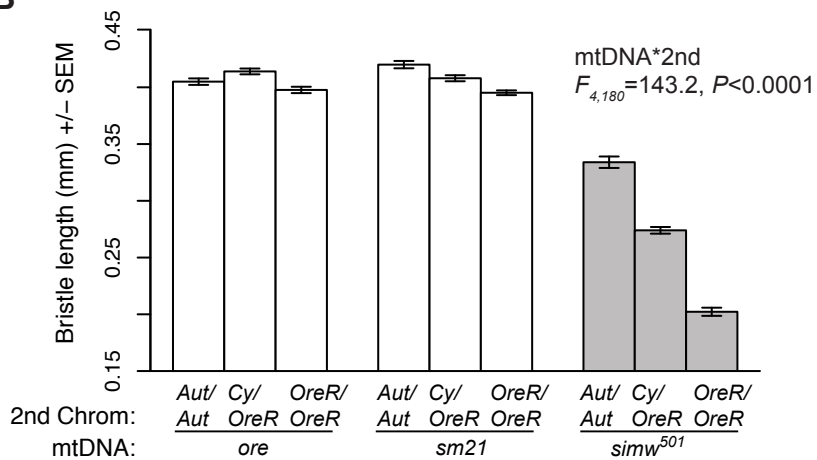

Supplement: pgen.1003238.s001.pdf [file pgen.1003238.s001.pdf]
