# Supplementary material for: An Incompatibility between a Mitochondrial tRNA and Its Nuclear-Encoded tRNA Synthetase Compromises Development and Fitness in Drosophila
Source: PubMed Central journal article supplement (PMC3561102; doi:10.1371/journal.pgen.1003238), 2013-01-31
Supplement: pgen.1003238.s004.pdf [file pgen.1003238.s004.pdf]

**Table S1.** Analysis of variance for mitochondrial and nuclear effects on organismal traits

| Dependent variable <sup>1</sup>                                         | Factor               | Df       | F value      | P value            |
|-------------------------------------------------------------------------|----------------------|----------|--------------|--------------------|
| Development time<br>(mean emergence time)<br>N=10-20 replicate vials    | <b>mtDNA</b>         | <b>2</b> | <b>152.2</b> | <b>&lt;2.2e-16</b> |
|                                                                         | <b>Nuclear</b>       | <b>1</b> | <b>216.5</b> | <b>&lt;2.2e-16</b> |
|                                                                         | <b>Sex</b>           | <b>1</b> | <b>6.631</b> | <b>0.0109</b>      |
|                                                                         | <b>mtDNA*nuclear</b> | <b>2</b> | <b>169.5</b> | <b>&lt;2.2e-16</b> |
|                                                                         | mtDNA*sex            | 2        | 0.041        | 0.9601             |
|                                                                         | <b>Nuclear*sex</b>   | <b>1</b> | <b>6.309</b> | <b>0.0130</b>      |
|                                                                         | mtDNA*nuclear*sex    | 2        | 0.072        | 0.9307             |
|                                                                         | Residuals            | 164      |              |                    |
| Development time<br>(day of first emergence)<br>N=10-20 replicate vials | <b>mtDNA</b>         | <b>2</b> | <b>185.7</b> | <b>&lt;2.2e-16</b> |
|                                                                         | <b>Nuclear</b>       | <b>1</b> | <b>465.2</b> | <b>&lt;2.2e-16</b> |
|                                                                         | <b>Sex</b>           | <b>1</b> | <b>7.608</b> | <b>0.006</b>       |
|                                                                         | <b>mtDNA*nuclear</b> | <b>2</b> | <b>105.8</b> | <b>&lt;2.2e-16</b> |
|                                                                         | mtDNA*sex            | 2        | 0.761        | 0.469              |
|                                                                         | Nuclear*sex          | 1        | 0.579        | 0.448              |
|                                                                         | mtDNA*nuclear*sex    | 2        | 0.025        | 0.976              |
|                                                                         | Residuals            | 164      |              |                    |
| Fecundity<br>(total eggs over ten days)<br>N=7-14 replicate females     | <b>mtDNA</b>         | <b>2</b> | <b>19.38</b> | <b>3.22e-07</b>    |
|                                                                         | <b>Nuclear</b>       | <b>1</b> | <b>299.7</b> | <b>&lt;2.2e-16</b> |
|                                                                         | <b>mtDNA*nuclear</b> | <b>2</b> | <b>7.325</b> | <b>0.0014</b>      |
|                                                                         | Residuals            | 60       |              |                    |
| Bristle length (mm)<br>N=10-14 individuals<br>per sex per genotype      | <b>mtDNA</b>         | <b>2</b> | <b>1372</b>  | <b>&lt;2.2e-16</b> |
|                                                                         | <b>Nuclear</b>       | <b>1</b> | <b>501.3</b> | <b>&lt;2.2e-16</b> |
|                                                                         | <b>Sex</b>           | <b>1</b> | <b>37.03</b> | <b>1.30e-08</b>    |
|                                                                         | <b>mtDNA*nuclear</b> | <b>2</b> | <b>250.3</b> | <b>&lt;2.2e-16</b> |
|                                                                         | mtDNA*sex            | 2        | 0.470        | 0.6264             |
|                                                                         | Nuclear*sex          | 1        | 0.474        | 0.4925             |
|                                                                         | mtDNA*nuclear*sex    | 2        | 0.264        | 0.7680             |
|                                                                         | Residuals            | 126      |              |                    |

<sup>1</sup> Data include the following genotypes: (*ore*);*OreR*, (*ore*);*AutW132*, (*simw*<sup>501</sup>);*OreR*, (*simw*<sup>501</sup>);*AutW132*, (*sm21*);*OreR*, (*sm21*);*AutW132*.
