# Supplementary material for: An Incompatibility between a Mitochondrial tRNA and Its Nuclear-Encoded tRNA Synthetase Compromises Development and Fitness in Drosophila
Source: PubMed Central journal article supplement (PMC3561102; doi:10.1371/journal.pgen.1003238), 2013-01-31
Supplement: pgen.1003238.s005.pdf [file pgen.1003238.s005.pdf]

**Table S2.** Analysis of variance of the effects of transgenic *Aatm* alleles on development time

| Dependent Variable                                      | Factor <sup>1</sup> | df | F     | P          | Contrasts                       | Effect     | P       |
|---------------------------------------------------------|---------------------|----|-------|------------|---------------------------------|------------|---------|
| Mean development time                                   | <i>Aatm</i> allele  | 2  | 62.2  | < 2.2 e-16 | <i>Ore-Aut</i>                  | +1.66 days | <0.0001 |
|                                                         |                     |    |       |            | <i>Ore-Ore</i> <sup>V275A</sup> | +2.09 days | <0.0001 |
|                                                         |                     |    |       |            | <i>Aut-Ore</i> <sup>V275A</sup> |            | NS      |
|                                                         | Sex                 | 1  | 7.83  | 0.0063     |                                 |            |         |
|                                                         | Brood               | 2  | 5.30  | 0.0068     |                                 |            |         |
|                                                         | Allele*brood        | 4  | 3.64  | 0.0087     |                                 |            |         |
|                                                         | Residuals           | 86 |       |            |                                 |            |         |
| Mean development time (normalized to control siblings)  | <i>Aatm</i> allele  | 2  | 180.9 | < 2.2 e-16 | <i>Ore-Aut</i>                  | +1.87 days | <0.0001 |
|                                                         |                     |    |       |            | <i>Ore-Ore</i> <sup>V275A</sup> | +2.01 days | <0.0001 |
|                                                         |                     |    |       |            | <i>Aut-Ore</i> <sup>V275A</sup> |            | NS      |
|                                                         | Sex                 | 1  | 40.0  | 9.66e-09   |                                 |            |         |
|                                                         | Brood               | 2  | 16.1  | 1.09e-06   |                                 |            |         |
|                                                         | Allele*brood        | 4  | 3.50  | 0.01052    |                                 |            |         |
|                                                         | Residuals           | 90 |       |            |                                 |            |         |
| Day of first emergence                                  | <i>Aatm</i> allele  | 2  | 75.9  | < 2.2 e-16 | <i>Ore-Aut</i>                  | +1.73 days | <0.0001 |
|                                                         |                     |    |       |            | <i>Ore-Ore</i> <sup>V275A</sup> | +1.94 days | <0.0001 |
|                                                         |                     |    |       |            | <i>Aut-Ore</i> <sup>V275A</sup> |            | NS      |
|                                                         | Sex                 | 1  | 3.18  | 0.0782     |                                 |            |         |
|                                                         | Allele*brood        | 4  | 4.75  | 0.0017     |                                 |            |         |
|                                                         | Residuals           | 86 |       |            |                                 |            |         |
| Day of first emergence (normalized to control siblings) | <i>Aatm</i> allele  | 2  | 82.2  | < 2.2 e-16 | <i>Ore-Aut</i>                  | +1.67 days | 0.0001  |
|                                                         |                     |    |       |            | <i>Ore-Ore</i> <sup>V275A</sup> | +1.83 days | 0.0001  |
|                                                         |                     |    |       |            | <i>Aut-Ore</i> <sup>V275A</sup> |            | NS      |
|                                                         | Sex                 | 1  | 25.2  | 2.59e-06   |                                 |            |         |
|                                                         | Allele*brood        | 4  | 3.03  | 0.0217     |                                 |            |         |
|                                                         | Residuals           | 90 |       |            |                                 |            |         |

<sup>1</sup>The full model contains the fixed effects of *Aatm* allele, sex and brood, and their interactions. Only significant factors are reported with Tukey's contrasts for allelic effects.
