# Supplementary material for: An Incompatibility between a Mitochondrial tRNA and Its Nuclear-Encoded tRNA Synthetase Compromises Development and Fitness in Drosophila
Source: PubMed Central journal article supplement (PMC3561102; doi:10.1371/journal.pgen.1003238), 2013-01-31
Supplement: pgen.1003238.s006.pdf [file pgen.1003238.s006.pdf]

**Table S3.** Analysis of variance of mitochondrial and nuclear effects on mitochondrial enzyme activities

| Dependent variable <sup>1</sup> | Factor                  | Df       | F value      | P value        |
|---------------------------------|-------------------------|----------|--------------|----------------|
| Complex I                       | <b>mtDNA</b>            | <b>1</b> | <b>31.22</b> | <b>3.6e-06</b> |
|                                 | <b>Nuclear</b>          | <b>1</b> | <b>10.03</b> | <b>0.0034</b>  |
|                                 | Sex                     | 1        | 1.971        | 0.1700         |
|                                 | Block                   | 2        | 0.093        | 0.9118         |
|                                 | <b>mtDNA*nuclear</b>    | <b>1</b> | <b>7.624</b> | <b>0.0095</b>  |
|                                 | mtDNA*sex               | 1        | 0.591        | 0.4480         |
|                                 | Nuclear*sex             | 1        | 1.796        | 0.1897         |
|                                 | mtDNA*block             | 2        | 0.318        | 0.7299         |
|                                 | Nuclear*block           | 1        | 1.247        | 0.3010         |
|                                 | mtDNA*nuclear*sex       | 1        | 0.700        | 0.4088         |
|                                 | mtDNA*nuclear*sex*block | 1        | 0.444        | 0.6453         |
|                                 | Residuals               | 32       |              |                |
| Complex II                      | mtDNA                   | 1        | 0.019        | 0.8913         |
|                                 | Nuclear                 | 1        | 0.075        | 0.7859         |
|                                 | <b>Sex</b>              | <b>1</b> | <b>13.33</b> | <b>0.0007</b>  |
|                                 | <b>Block</b>            | <b>2</b> | <b>24.87</b> | <b>5.9e-08</b> |
|                                 | mtDNA*nuclear           | 1        | 1.484        | 0.2296         |
|                                 | mtDNA*sex               | 1        | 1.165        | 0.2863         |
|                                 | <b>Nuclear*sex</b>      | <b>1</b> | <b>8.322</b> | <b>0.0060</b>  |
|                                 | mtDNA*block             | 2        | 0.743        | 0.4815         |
|                                 | Nuclear*block           | 2        | 0.283        | 0.7546         |
|                                 | mtDNA*nuclear*sex       | 1        | 2.461        | 0.1239         |
|                                 | mtDNA*nuclear*sex*block | 2        | 1.836        | 0.1715         |
|                                 | Residuals               | 44       |              |                |
| Complex III                     | mtDNA                   | 1        | 1.282        | 0.2636         |
|                                 | <b>Nuclear</b>          | <b>1</b> | <b>15.06</b> | <b>0.0003</b>  |
|                                 | Sex                     | 1        | 0.513        | 0.4776         |
|                                 | <b>Block</b>            | <b>1</b> | <b>5.791</b> | <b>0.0204</b>  |
|                                 | <b>mtDNA*nuclear</b>    | <b>1</b> | <b>11.59</b> | <b>0.0014</b>  |
|                                 | mtDNA*sex               | 1        | 2.335        | 0.1337         |
|                                 | Nuclear*sex             | 1        | 0.102        | 0.7506         |
|                                 | mtDNA*block             | 1        | 2.527        | 0.1190         |
|                                 | Nuclear*block           | 1        | 0.575        | 0.4522         |
|                                 | mtDNA*nuclear*sex       | 1        | 0.116        | 0.7352         |
|                                 | mtDNA*nuclear*sex*block | 1        | 1.236        | 0.2723         |
|                                 | Residuals               | 44       |              |                |
| Complex IV                      | mtDNA                   | 1        | 2.291        | 0.1358         |
|                                 | <b>Nuclear</b>          | <b>1</b> | <b>14.56</b> | <b>0.0003</b>  |
|                                 | <b>Sex</b>              | <b>1</b> | <b>56.84</b> | <b>4.5e-10</b> |
|                                 | <b>mtDNA*nuclear</b>    | <b>1</b> | <b>10.25</b> | <b>0.0023</b>  |
|                                 | mtDNA*sex               | 1        | 0.329        | 0.5684         |
|                                 | Nuclear*sex             | 1        | 0.114        | 0.7364         |
|                                 | mtDNA*nuclear*sex       | 1        | 0.178        | 0.6747         |
|                                 | Residuals               | 56       |              |                |
|                                 | Citrate synthase        | mtDNA    | 1            | 0.479          |
| Nuclear                         |                         | 1        | 0.067        | 0.7979         |
| <b>Sex</b>                      |                         | <b>1</b> | <b>4.640</b> | <b>0.0415</b>  |
| mtDNA*nuclear                   |                         | 1        | 0.050        | 0.8241         |
| mtDNA*sex                       |                         | 1        | 1.663        | 0.2095         |
| Nuclear*sex                     |                         | 1        | 0.528        | 0.4744         |
| mtDNA*nuclear*sex               |                         | 1        | 0.131        | 0.7207         |
| Residuals                       |                         | 24       |              |                |

<sup>1</sup> Data include the following genotypes: (*ore*);*OreR*, (*ore*);*AutW132*, (*simw*<sup>501</sup>);*OreR*, (*simw*<sup>501</sup>);*AutW132*.
