# Supplementary material for: An Incompatibility between a Mitochondrial tRNA and Its Nuclear-Encoded tRNA Synthetase Compromises Development and Fitness in Drosophila
Source: PubMed Central journal article supplement (PMC3561102; doi:10.1371/journal.pgen.1003238), 2013-01-31
Supplement: pgen.1003238.s008.pdf [file pgen.1003238.s008.pdf]

**Table S5.** Additional primers used in this study

| Genomic region                           | Primer name         | Primer sequence               | PCR product (bp) | Primers used for sequencing  |
|------------------------------------------|---------------------|-------------------------------|------------------|------------------------------|
| <i>Aatm</i><br>(Chrom 2R)                | 1909_F1             | AAGAGCGGCAAGTTTTACGA          | 854              | 1909_F1,<br>2202_R1, 2722_R2 |
|                                          | 2202_R1             | TAAACGCAGGCGGATTTTAC          |                  |                              |
|                                          | 2411_R2             | TAACAAGACCTCGCCTTTTCG         | 840              | 2411_F2, 3210_R3             |
|                                          | 2411_F2             | GTCTGCTGGATCTCGGAAAG          |                  |                              |
|                                          | 3210_R3             | ATCACGAGAACTGCCTTTGG          | 826              | 2923_F3, 3708_R4             |
|                                          | 2923_F3             | TTTGAAAGCAGCAGTTGTGG          |                  |                              |
|                                          | 3708_R4             | TTCCAACGAACTTCGCATAA          | 863              | 3409_F4, 4233_R5             |
|                                          | 3409_F4             | CAGTGGATCAGGCCATTAT           |                  |                              |
| 4233_R5                                  | GATGTGTGGTTGCCTCGAC |                               |                  |                              |
| $\Phi$ C31-<br>mediated<br>insertion PCR | attP-F              | AGGTCAGAAGCGGTTTTTCGGGAGTAGTG | 134              |                              |
|                                          | attP-R              | GGTCGTAAGCACCCGCGTACGTGTCCAC  |                  |                              |
|                                          | P[acman]-F          | ACGCCTGGTTGCTACGCCTGAATAAGTG  | 227 &            |                              |
|                                          | P[acman]-R          | CCCACGGACATGCTAAGGGTTAATCAAC  | 454              |                              |
