# Supplementary material for: An Incompatibility between a Mitochondrial tRNA and Its Nuclear-Encoded tRNA Synthetase Compromises Development and Fitness in Drosophila
Source: PLoS Genet. 2013 Jan 31;9(1):e1003238. doi: 10.1371/journal.pgen.1003238 (PMC3561102; doi:10.1371/journal.pgen.1003238)
Supplement: Table S4 — Primers used to amplify and sequence the sm21 and simw501 mtDNAs. (PDF) [file pgen.1003238.s007.pdf]

**Table S4.** Primers used to amplify and sequence the *sm21* and *simw*<sup>501</sup> mtDNAs

| Forward primers <sup>1</sup> | Sequence                    | Reverse primers <sup>1</sup> | Sequence                    |
|------------------------------|-----------------------------|------------------------------|-----------------------------|
| 47                           | ggattaccttgatagggtaaatcatgc | 1112                         | gcagaataacagattcg           |
| 339                          | ggtaggagcttgaatagg          | 1461                         | cgcggttattgattaagtggc       |
| 1005                         | ggaggactacccccatttttagg     | 1930                         | gctcctagaattgaagaaattcc     |
| TyrF_1325                    | agccttagtaaaaattactccttca   | TyrR_1561                    | gttccgactatcccagctca        |
| 1852                         | cggagctggaacaggatgaactg     | 2827                         | gttgatccaatagtagacac        |
| 2783                         | ggattagctggaatacctcg        | 3647                         | ccataaaataaacctggctcg       |
| 3593                         | gaacagttcccgccttaggag       | 4528                         | gcagttaatcggacagctaattgtccc |
| ATP6F_4248                   | gaccatcaggtcataatggatctac   | ATP6R_4603                   | aggtcctgtatttcctaaaagatt    |
| 4463                         | gctcacttagtccctcaagg        | 5442                         | catgcagctgcttcaaatcc        |
| 5314                         | gctccatttactattgcggactc     | 6195                         | cattaacagtgtacgcctc         |
| 6143                         | gaagcgattgattgcagttagtttcg  | 6969                         | ctggggatttaaattgtgg         |
| 6931                         | accctaatttccacgaag          | 7740                         | atcgaattggagatgtagc         |
| 7852                         | gtcctaattccatctcatcc        | 8896                         | gggttattacgagtattgc         |
| 8780                         | gagcaacagatgaataagc         | 9672                         | gagtatgtgaggagcttttagg      |
| 9699                         | gctccctcacatactctaaatg      | 10600                        | ggagctggtaaatctactaaagcg    |
| 10175                        | gggaggaatacttgtgtattttat    | 10712                        | cagcagtatagtgtatagc         |
| 10562                        | gctttagtagattaccagctcc      | 11041                        | tcaacggcaaaccacctca         |
| 10641                        | ccagctccaattaatatctc        | 11573                        | ggttctcgactggcgagctcc       |
| 11355                        | gctaatacctttagttacacctgc    | 12329                        | gctggtgatcttctaattc         |
| 12312                        | gagctacagctcgtaaacctcc      | 13356                        | gccgcagtattttgactgtgc       |
| 12950                        | tccaacatcgaggtcgcaat        | 13294                        | ggctggaatgaatggttgacg       |
| 13321                        | cgtccaaccattcattccagc       | 14251                        | atgtacacatcgcccgctcg        |
| 13888                        | aacgctgatacacaaggtacaa      | 14236                        | cacatcgcccgctcgtctta        |
| 14226                        | ccagtacatctactatgttacg      | 14787                        | ccaaattggtgccagcagtcgcgg    |
|                              |                             | srRNA_14929                  | ttaaagtttttttggc            |

<sup>1</sup> Primer names indicate approximate bp position in *D. simulans* mtDNA sequence AF200839.1
